# Supplementary material
Source: PubMed Central journal article supplement (PMC5462006)
Supplement: supp_pp.16.01625_PP2016-01625R2_Supplemental_Material_Figure_7.pdf [file supp_pp.16.01625_PP2016-01625R2_Supplemental_Material_Figure_7.pdf]

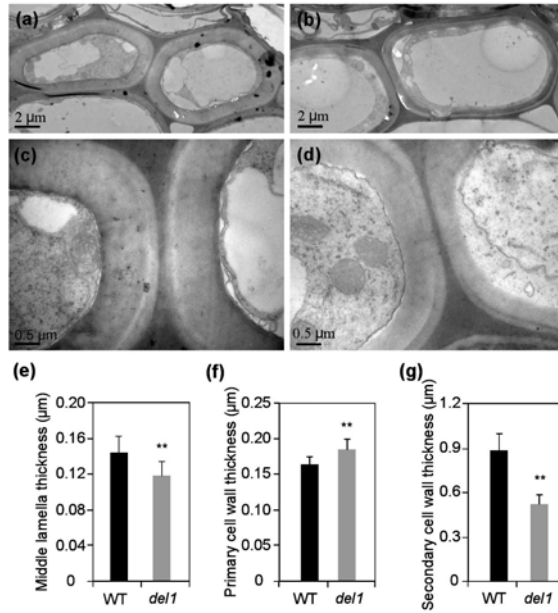

1  
 2 **Supplemental Figure 7.** Cell wall structure in wild-type and *del1* roots  
 3 (a and d) TEM micrographs of the sclerenchyma cell in wild-type (a, c) and *del1* (b, d)  
 4 roots. (a) and (b) scale bar = 2 μm, (c) and (d) scale bar = 1 μm. (e–g) Statistical  
 5 analysis of the middle lamella (e), primary cell wall (f), and secondary cell wall (g)  
 6 thicknesses of sclerenchyma cell between the wild-type and *del1* roots, mean ± SD of  
 7 30 cells, \*\* indicates  $P < 0.01$  (Student's *t*-test).
